# Supplementary material for: Association between different insulin resistance surrogates and all-cause mortality in peritoneal dialysis patients
Source: Research Square preprint supplement (doi:10.21203/rs.3.rs-4193924/v1), 2024-04-04
Supplement: Supplementary file 1 [file 137f3154b5afe23de42111ec.docx]

**Table S3.** The ROC curve analysis determined the optimal cutoff value of the IR index for predicting all-cause mortality in PD patients

| Test | Optimal cut-off value | Sensitivity | Specificity | AUC |
| --- | --- | --- | --- | --- |
| TyG index | 8.59 | 0.635 | 0.535 | 0.567 |
| TyG-BMI index | 191.75 | 0.545 | 0.544 | 0.533 |
| TG/HDL-C ratio | 1.21 | 0.566 | 0.520 | 0.530 |

ROC curve, receiver operating characteristic curve; AUC, area under the curve; TyG index, triglyceride-glucose index; TyG-BMI index, triglyceride glucose body mass index; TG/HDL-C ratio, triglyceride/high-density lipoprotein cholesterol ratio
